# Supplementary material for: Ranitidine and finasteride inhibit the synthesis and release of trimethylamine N-oxide and mitigates its cardiovascular and renal damage through modulating gut microbiota
Source: PubMed Central journal article supplement (PMC7019130; doi:10.7150/ijbs.40934), 2020-01-14
Supplement: ijbsv16p0790s1.pdf [file ijbsv16p0790s1.pdf]

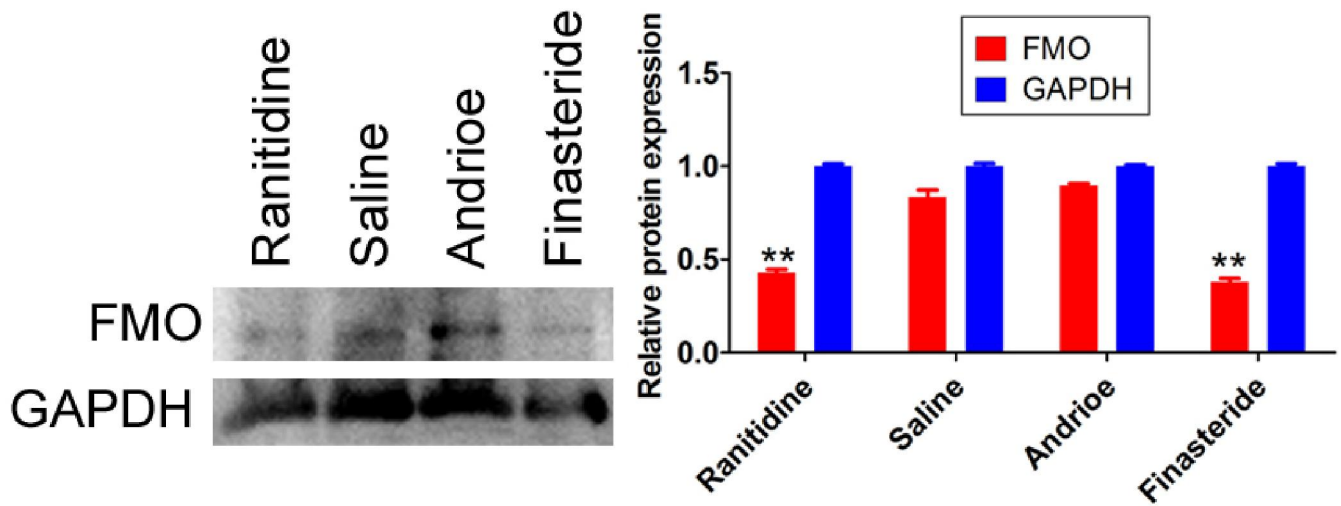

Figure S1 The results of western blot. The result showed that FMO3 expression in the liver tissue of mice treated with ranitidine and finasteride was significantly lower than in the saline-control and Andrioe-treated groups. \*\*  $p < 0.01$  vs Saline group; t test.

**Table S1 The results of sample sequencing data processing statistics**

| Sample ID | PE Reads | Raw Tags | Clean Tags | Effective Tags | AvgLen(bp) | GC(%) | Q20(%) | Q30(%) | Effective(%) |
|-----------|----------|----------|------------|----------------|------------|-------|--------|--------|--------------|
| A1        | 79882    | 65646    | 57536      | 55953          | 415        | 54.34 | 96.61  | 93.42  | 70.04        |
| A2        | 79873    | 64205    | 55290      | 54009          | 417        | 55.15 | 96.67  | 93.44  | 67.62        |
| A3        | 80158    | 67473    | 59480      | 58151          | 415        | 54.27 | 96.68  | 93.53  | 72.55        |
| A4        | 79944    | 67108    | 59113      | 57672          | 415        | 53.86 | 96.48  | 93.22  | 72.14        |
| A5        | 79778    | 65248    | 56964      | 55605          | 417        | 54.44 | 96.58  | 93.31  | 69.7         |
| A6        | 80127    | 65231    | 56760      | 55491          | 416        | 54.84 | 96.64  | 93.41  | 69.25        |
| A7        | 79802    | 65495    | 57147      | 55230          | 415        | 54.83 | 96.59  | 93.33  | 69.21        |
| A8        | 79817    | 65274    | 56990      | 55560          | 415        | 54.52 | 96.63  | 93.41  | 69.61        |
| FEN1      | 80088    | 67152    | 59822      | 56824          | 415        | 54.46 | 96     | 92.14  | 70.95        |
| FEN2      | 79947    | 67468    | 59875      | 57420          | 418        | 54.32 | 96.07  | 92.29  | 71.82        |
| FEN3      | 80259    | 64784    | 56786      | 55039          | 415        | 54.7  | 96.06  | 92.29  | 68.58        |
| FEN4      | 80168    | 67506    | 60133      | 57973          | 415        | 54.11 | 96.11  | 92.39  | 72.31        |
| FEN5      | 7978     | 6475     | 5670       | 54806          | 415        | 53.87 | 96.02  | 92.21  | 68.69        |

|      |           |           |           |       |     |       |       |       |       |
|------|-----------|-----------|-----------|-------|-----|-------|-------|-------|-------|
|      | 7         | 1         | 3         |       |     |       |       |       |       |
| FEN6 | 7975<br>7 | 6667<br>1 | 5944<br>6 | 57728 | 415 | 54.34 | 96.17 | 92.43 | 72.38 |
| FEN7 | 8003<br>6 | 6764<br>2 | 6024<br>7 | 56580 | 416 | 54.26 | 96.06 | 92.31 | 70.69 |
| FEN8 | 8036<br>3 | 6647<br>6 | 5862<br>3 | 56923 | 416 | 54.37 | 96.02 | 92.17 | 70.83 |
| R1   | 7988<br>0 | 6672<br>0 | 5907<br>4 | 58359 | 413 | 54.24 | 96.59 | 93.43 | 73.06 |
| R2   | 8020<br>9 | 6680<br>1 | 5892<br>9 | 58311 | 414 | 54.29 | 96.65 | 93.47 | 72.7  |
| R3   | 8012<br>5 | 6914<br>6 | 6184<br>8 | 60935 | 412 | 53.73 | 96.59 | 93.45 | 76.05 |
| R4   | 7997<br>4 | 6725<br>6 | 5966<br>2 | 58542 | 412 | 53.82 | 96.45 | 93.16 | 73.2  |
| R5   | 7968<br>1 | 6980<br>2 | 6287<br>0 | 61949 | 411 | 53.44 | 96.58 | 93.42 | 77.75 |
| R6   | 8030<br>2 | 6903<br>0 | 6163<br>8 | 60710 | 412 | 54.25 | 96.56 | 93.37 | 75.6  |
| R7   | 7978<br>6 | 6518<br>6 | 5675<br>8 | 55797 | 416 | 54.41 | 96.52 | 93.22 | 69.93 |
| R8   | 7978<br>1 | 6752<br>4 | 6000<br>9 | 58603 | 413 | 54.27 | 96.57 | 93.39 | 73.45 |
| W1   | 7997<br>3 | 6824<br>1 | 6103<br>7 | 58773 | 418 | 51.61 | 96.6  | 93.43 | 73.49 |
| W2   | 8031<br>7 | 7046<br>6 | 6338<br>1 | 62267 | 418 | 52.17 | 96.62 | 93.44 | 77.53 |
| W3   | 7982<br>4 | 7004<br>5 | 6317<br>3 | 62099 | 416 | 52.08 | 96.63 | 93.46 | 77.79 |

|    |           |           |           |       |     |       |       |       |       |
|----|-----------|-----------|-----------|-------|-----|-------|-------|-------|-------|
| W4 | 7977<br>9 | 6885<br>9 | 6154<br>7 | 60488 | 418 | 51.68 | 96.45 | 93.19 | 75.82 |
| W5 | 7992<br>1 | 7044<br>5 | 6356<br>3 | 62460 | 418 | 51.59 | 96.67 | 93.56 | 78.15 |
| W6 | 7976<br>0 | 6869<br>1 | 6172<br>5 | 60874 | 420 | 51.06 | 96.7  | 93.63 | 76.32 |
| W7 | 7972<br>1 | 6941<br>1 | 6243<br>5 | 61246 | 418 | 51.79 | 96.62 | 93.45 | 76.83 |
| W8 | 8036<br>0 | 6978<br>7 | 6251<br>1 | 61299 | 419 | 51.51 | 96.58 | 93.39 | 76.28 |

**Table S2 Alpha diversity index statistics**

| <b>Sample ID</b> | <b>OTU</b> | <b>ACE</b> | <b>Chao1</b> | <b>Simpson</b> | <b>Shannon</b> | <b>Coverage</b> |
|------------------|------------|------------|--------------|----------------|----------------|-----------------|
| A1               | 349        | 356.2348   | 357.5714     | 0.0246         | 4.4439         | 0.9996          |
| A2               | 346        | 352.2343   | 356.2        | 0.0271         | 4.387          | 0.9996          |
| A3               | 359        | 363.8258   | 365.5        | 0.0288         | 4.471          | 0.9997          |
| A4               | 355        | 361.7728   | 364.2308     | 0.0273         | 4.473          | 0.9997          |
| R5               | 354        | 361.0806   | 362.5714     | 0.0339         | 4.4825         | 0.9997          |
| R6               | 338        | 350.8598   | 349          | 0.0419         | 4.1996         | 0.9996          |
| R7               | 349        | 355.8748   | 359          | 0.0195         | 4.5906         | 0.9997          |
| R8               | 349        | 352.3699   | 352          | 0.0508         | 4.1888         | 0.9998          |
| W1               | 54         | 192.1155   | 124          | 0.2482         | 1.8598         | 0.9996          |
| W2               | 40         | 204.223    | 79           | 0.1964         | 2.0594         | 0.9998          |
| W3               | 38         | 119.3596   | 71           | 0.2036         | 1.9729         | 0.9998          |
| W4               | 52         | 123.5124   | 103          | 0.2025         | 2.1266         | 0.9997          |
| W5               | 40         | 107.9454   | 58.3333      | 0.2038         | 2.0666         | 0.9998          |
| W6               | 40         | 72.5537    | 49.3333      | 0.2591         | 1.8963         | 0.9999          |
| W7               | 35         | 60.8773    | 45.5         | 0.2107         | 1.9424         | 0.9999          |
| W8               | 43         | 111.0345   | 65.5         | 0.2583         | 1.8203         | 0.9998          |
| A5               | 359        | 363.9935   | 363.1053     | 0.0228         | 4.4921         | 0.9997          |
| A6               | 363        | 368.4088   | 367.5882     | 0.0208         | 4.5909         | 0.9997          |
| A7               | 353        | 358.7041   | 363.9091     | 0.0225         | 4.467          | 0.9996          |
| A8               | 364        | 368.4355   | 370.5        | 0.024          | 4.5061         | 0.9997          |
| FEN1             | 317        | 331.6806   | 332.4762     | 0.0483         | 4.0035         | 0.9992          |
| FEN2             | 309        | 327.5397   | 335.64       | 0.153          | 3.0112         | 0.9991          |
| FEN3             | 311        | 320.7279   | 320.5        | 0.0384         | 4.2046         | 0.9994          |
| FEN4             | 316        | 328.1112   | 328.0476     | 0.0425         | 4.0977         | 0.9994          |
| FEN5             | 322        | 329.4535   | 330.0526     | 0.0347         | 4.1957         | 0.9995          |
| FEN6             | 322        | 332.3943   | 333          | 0.0571         | 3.9718         | 0.9993          |
| FEN7             | 312        | 327.3241   | 329.6522     | 0.0589         | 3.7382         | 0.9992          |

|      |     |          |          |        |        |        |
|------|-----|----------|----------|--------|--------|--------|
| FEN8 | 321 | 330.7174 | 328.9167 | 0.0592 | 3.993  | 0.9995 |
| R1   | 351 | 357.5436 | 358.5    | 0.0194 | 4.6551 | 0.9997 |
| R2   | 355 | 367.3563 | 367.3529 | 0.0205 | 4.612  | 0.9996 |
| R3   | 349 | 356.7963 | 354.7143 | 0.0344 | 4.3975 | 0.9997 |
| R4   | 350 | 354.1829 | 353.2353 | 0.0278 | 4.5348 | 0.9998 |

**Table S3 Species statistics of different grades of samples**

| <b>Sample</b> | <b>Kindom</b> | <b>Phylum</b> | <b>Class</b> | <b>Order</b> | <b>Family</b> | <b>Genus</b> | <b>Species</b> |
|---------------|---------------|---------------|--------------|--------------|---------------|--------------|----------------|
| A1            | 1             | 10            | 16           | 18           | 32            | 85           | 87             |
| A2            | 1             | 10            | 16           | 17           | 32            | 85           | 85             |
| A3            | 1             | 10            | 16           | 17           | 31            | 83           | 86             |
| A4            | 1             | 10            | 16           | 18           | 33            | 85           | 87             |
| A5            | 1             | 10            | 16           | 17           | 32            | 85           | 87             |
| A6            | 1             | 10            | 16           | 17           | 30            | 84           | 86             |
| A7            | 1             | 10            | 16           | 17           | 30            | 82           | 83             |
| A8            | 1             | 10            | 16           | 17           | 31            | 85           | 87             |
| FEN1          | 1             | 10            | 16           | 16           | 29            | 78           | 78             |
| FEN2          | 1             | 10            | 16           | 16           | 30            | 77           | 78             |
| FEN3          | 1             | 10            | 15           | 15           | 28            | 76           | 77             |
| FEN4          | 1             | 10            | 15           | 15           | 26            | 75           | 76             |
| FEN5          | 1             | 10            | 16           | 16           | 30            | 80           | 81             |
| FEN6          | 1             | 10            | 16           | 16           | 29            | 80           | 81             |
| FEN7          | 1             | 10            | 15           | 15           | 29            | 77           | 78             |
| FEN8          | 1             | 10            | 16           | 17           | 31            | 80           | 81             |
| R1            | 1             | 10            | 16           | 17           | 31            | 83           | 84             |
| R2            | 1             | 10            | 16           | 17           | 31            | 82           | 83             |
| R3            | 1             | 10            | 16           | 17           | 32            | 82           | 83             |
| R4            | 1             | 10            | 16           | 17           | 30            | 81           | 82             |
| R5            | 1             | 10            | 16           | 17           | 32            | 82           | 83             |
| R6            | 1             | 10            | 16           | 16           | 31            | 80           | 81             |
| R7            | 1             | 10            | 15           | 16           | 31            | 82           | 83             |
| R8            | 1             | 10            | 16           | 17           | 30            | 82           | 84             |
| W1            | 1             | 7             | 11           | 12           | 20            | 39           | 39             |
| W2            | 1             | 6             | 8            | 9            | 16            | 29           | 29             |
| W3            | 1             | 6             | 9            | 10           | 17            | 27           | 27             |

|       |   |    |    |    |    |    |    |
|-------|---|----|----|----|----|----|----|
| W4    | 1 | 6  | 8  | 9  | 17 | 39 | 39 |
| W5    | 1 | 7  | 9  | 10 | 16 | 29 | 29 |
| W6    | 1 | 6  | 8  | 9  | 15 | 28 | 28 |
| W7    | 1 | 6  | 8  | 9  | 16 | 28 | 28 |
| W8    | 1 | 8  | 11 | 12 | 19 | 36 | 37 |
| Total | 1 | 10 | 16 | 19 | 34 | 91 | 94 |



**Table S4 Analysis on the difference of metabolic pathway of KEGG (FEN vs W)**

| <b>Class1</b> | <b>Class2</b>                               | <b>FEN</b>  | <b>W</b>    | <b>FEN:<br/>rel.<br/>freq.<br/>(%)</b> | <b>W: rel.<br/>freq.<br/>(%)</b> | <b>p-val<br/>ues<br/>(correc<br/>ted)</b> | <b>Effect<br/>size</b> | <b>95.0%<br/>lower<br/>CI</b> | <b>95.0%<br/>upper<br/>CI</b> |
|---------------|---------------------------------------------|-------------|-------------|----------------------------------------|----------------------------------|-------------------------------------------|------------------------|-------------------------------|-------------------------------|
| Metabolism    | Carbohydrate metabolism                     | 3101<br>849 | 5511<br>771 | 14.975<br>20522                        | 15.926<br>48857                  | 0                                         | -0.9512<br>83352       | -0.9709<br>06411              | -0.9316<br>60293              |
| Metabolism    | Lipid metabolism                            | 7656<br>78  | 1434<br>282 | 3.6965<br>64592                        | 4.1444<br>16719                  | 0                                         | -0.4478<br>52127       | -0.4583<br>53432              | -0.4373<br>50821              |
| Metabolism    | Metabolism of cofactors and vitamins        | 1343<br>061 | 2226<br>544 | 6.4840<br>72597                        | 6.4336<br>90292                  | 1.90E-<br>13                              | 0.05038<br>2305        | 0.03698<br>5362               | 0.06377<br>9248               |
| Metabolism    | Energy metabolism                           | 1429<br>491 | 2447<br>315 | 6.9013<br>42099                        | 7.0716<br>17159                  | 0                                         | -0.1702<br>75061       | -0.1841<br>42747              | -0.1564<br>07375              |
| Metabolism    | Nucleotide metabolism                       | 1117<br>547 | 1731<br>120 | 5.3953<br>28938                        | 5.0021<br>42306                  | 0                                         | 0.39318<br>6632        | 0.38103<br>7844               | 0.40533<br>5419               |
| Metabolism    | Biosynthesis of other secondary metabolites | 2809<br>70  | 5327<br>46  | 1.3564<br>75899                        | 1.5393<br>91437                  | 0                                         | -0.1829<br>15538       | -0.1893<br>76017              | -0.1764<br>55059              |
| Metabolism    | Amino acid                                  | 2281        | 3942        | 11.017                                 | 11.392                           | 0                                         | -0.3749                | -0.3921                       | -0.3578                       |

|                                |                                           |         |         |             |             |   |              |              |              |
|--------------------------------|-------------------------------------------|---------|---------|-------------|-------------|---|--------------|--------------|--------------|
| ism                            | metabolism                                | 995     | 521     | 08801       | 07628       |   | 88263        | 38135        | 38392        |
| Metabolism                     | Metabolism of terpenoids and polyketides  | 388096  | 696824  | 1.873662208 | 2.013501554 | 0 | -0.139839346 | -0.147330068 | -0.132348624 |
| Metabolism                     | Xenobiotics biodegradation and metabolism | 418000  | 716849  | 2.01803369  | 2.071364614 | 0 | -0.053330924 | -0.061031796 | -0.045630051 |
| Metabolism                     | Metabolism of other amino acids           | 423180  | 755284  | 2.043041858 | 2.182424124 | 0 | -0.139382265 | -0.147188053 | -0.131576478 |
| Metabolism                     | Glycan biosynthesis and metabolism        | 605924  | 1220926 | 2.925299152 | 3.527915798 | 0 | -0.602616647 | -0.612134406 | -0.593098888 |
| Genetic Information Processing | Translation                               | 1060066 | 1538206 | 5.117820338 | 4.444709383 | 0 | 0.673110955  | 0.66139012   | 0.68483179   |
| Metabolism                     | Global and                                | 2853    | 4643    | 13.777      | 13.416      | 0 | 0.36081      | 0.34211      | 0.37950      |

|                                      |                                  |            |             |                 |                 |              |                  |                  |                  |
|--------------------------------------|----------------------------------|------------|-------------|-----------------|-----------------|--------------|------------------|------------------|------------------|
| ism                                  | overview maps                    | 768        | 194         | 51188           | 69967           |              | 2207             | 6202             | 8213             |
| Human Diseases                       | Drug resistance                  | 1676<br>13 | 3084<br>26  | 0.8092<br>0737  | 0.8912<br>09588 | 0            | -0.0820<br>02218 | -0.0869<br>78721 | -0.0770<br>25715 |
| Environmental Information Processing | Membrane transport               | 9533<br>44 | 1468<br>634 | 4.6025<br>84474 | 4.2436<br>78233 | 0            | 0.35890<br>624   | 0.34764<br>9834  | 0.37016<br>2647  |
| Environmental Information Processing | Signal transduction              | 7294<br>07 | 1117<br>801 | 3.5214<br>54305 | 3.2299<br>31877 | 0            | 0.29152<br>2428  | 0.28163<br>0372  | 0.30141<br>4483  |
| Cellular Processes                   | Cell motility                    | 3962<br>39 | 2579<br>84  | 1.9129<br>75242 | 0.7454<br>55359 | 0            | 1.16751<br>9883  | 1.16095<br>3959  | 1.17408<br>5808  |
| Genetic Information Processing       | Folding, sorting and degradation | 4464<br>97 | 7575<br>27  | 2.1556<br>12412 | 2.1889<br>05364 | 2.81E-<br>16 | -0.0332<br>92952 | -0.0412<br>3028  | -0.0253<br>55624 |
| Genetic Information Processing       | Transcription                    | 4622<br>5  | 6943<br>9   | 0.2231<br>66525 | 0.2006<br>46841 | 0            | 0.02251<br>9684  | 0.01999<br>1741  | 0.02504<br>7626  |

|                                      |                                     |        |         |             |             |             |              |              |              |
|--------------------------------------|-------------------------------------|--------|---------|-------------|-------------|-------------|--------------|--------------|--------------|
| ing                                  |                                     |        |         |             |             |             |              |              |              |
| Genetic Information Processing       | Replication and repair              | 902255 | 1423866 | 4.355935375 | 4.114319259 | 0           | 0.241616116  | 0.230606005  | 0.252626227  |
| Organismal Systems                   | Endocrine system                    | 99947  | 199848  | 0.482527304 | 0.577469    | 0           | -0.094941696 | -0.09885805  | -0.091025341 |
| Environmental Information Processing | Signaling molecules and interaction | 0      | 0       | 0           | 0           | 1.075       | 0            | -7.56E-06    | 7.56E-06     |
| Cellular Processes                   | Cell growth and death               | 149540 | 236691  | 0.721953966 | 0.683928361 | 0           | 0.038025605  | 0.033453795  | 0.042597416  |
| Cellular Processes                   | Transport and catabolism            | 122564 | 266873  | 0.591718376 | 0.771140489 | 0           | -0.179422113 | -0.183834528 | -0.175009699 |
| Organismal Systems                   | Circulatory system                  | 3708   | 225     | 0.0179016   | 0.000650147 | 0           | 0.017251454  | 0.016661517  | 0.01784139   |
| Organismal System                    | Development                         | 0      | 0       | 0           | 0           | 1.048780488 | 0            | -7.56E-06    | 7.56E-06     |

|                    |                                  |       |        |             |             |             |              |              |              |
|--------------------|----------------------------------|-------|--------|-------------|-------------|-------------|--------------|--------------|--------------|
| s                  |                                  |       |        |             |             |             |              |              |              |
| Cellular Processes | Cellular community               | 0     | 0      | 0           | 0           | 1.023809524 | 0            | -7.56E-06    | 7.56E-06     |
| Organismal Systems | Immune system                    | 25437 | 46780  | 0.122805557 | 0.13517273  | 0           | -0.012367173 | -0.014317193 | -0.010417153 |
| Organismal Systems | Environmental adaptation         | 43076 | 63132  | 0.207963682 | 0.182422506 | 0           | 0.025541177  | 0.023110793  | 0.027971561  |
| Organismal Systems | Nervous system                   | 68232 | 135929 | 0.329412619 | 0.392772426 | 0           | -0.063359807 | -0.0665972   | -0.060122413 |
| Organismal Systems | Sensory system                   | 0     | 0      | 0           | 0           | 1           | 0            | -7.56E-06    | 7.56E-06     |
| Human Diseases     | Endocrine and metabolic diseases | 31188 | 50408  | 0.150570418 | 0.145655985 | 4.70E-06    | 0.004914433  | 0.00280861   | 0.007020256  |
| Organismal Systems | Excretory system                 | 12094 | 32024  | 0.058387798 | 0.092534663 | 0           | -0.034146865 | -0.035606465 | -0.032687265 |
| Organis            | Digestive                        | 4973  | 1734   | 0.0240      | 0.0501      | 0           | -0.0261      | -0.0271      | -0.0250      |

|                       |                                      |            |            |                 |                 |              |                  |                  |                  |
|-----------------------|--------------------------------------|------------|------------|-----------------|-----------------|--------------|------------------|------------------|------------------|
| mal<br>System<br>s    | system                               |            | 2          | 08808           | 10421           |              | 01613            | 0973             | 93497            |
| Human<br>Disease<br>s | Neurodege<br>nerative<br>diseases    | 5869<br>6  | 6645<br>7  | 0.2833<br>74415 | 0.1920<br>3023  | 0            | 0.09134<br>4185  | 0.08862<br>2217  | 0.09406<br>6154  |
| Human<br>Disease<br>s | Substance<br>dependenc<br>e          | 9900       | 2375<br>1  | 0.0477<br>95535 | 0.0686<br>2949  | 0            | -0.0208<br>33955 | -0.0221<br>24973 | -0.0195<br>42937 |
| Human<br>Disease<br>s | Infectious<br>diseases:<br>Bacterial | 1667<br>45 | 2722<br>20 | 0.8050<br>16812 | 0.7865<br>90865 | 9.96E-<br>14 | 0.01842<br>5947  | 0.01357<br>3582  | 0.02327<br>8312  |
| Human<br>Disease<br>s | Infectious<br>diseases:<br>Parasitic | 1144<br>5  | 2672<br>1  | 0.0552<br>54535 | 0.0772<br>11426 | 0            | -0.0219<br>56892 | -0.0233<br>35793 | -0.0205<br>7799  |
| Human<br>Disease<br>s | Infectious<br>diseases:<br>Viral     | 20         | 135        | 9.66E-<br>05    | 0.0003<br>90088 | 9.43E-<br>12 | -0.0002<br>93531 | -0.0003<br>79329 | -0.0002<br>07734 |
| Human<br>Disease<br>s | Cancers:<br>Overview                 | 1644<br>39 | 3067<br>42 | 0.7938<br>83832 | 0.8863<br>43601 | 0            | -0.0924<br>59769 | -0.0974<br>02682 | -0.0875<br>16856 |
| Human<br>Disease<br>s | Cancers:<br>Specific<br>types        | 1851<br>3  | 3779<br>8  | 0.0893<br>7765  | 0.1092<br>18873 | 0            | -0.0198<br>41223 | -0.0215<br>42043 | -0.0181<br>40403 |
| Human<br>Disease<br>s | Immune<br>diseases                   | 1150<br>4  | 2319<br>2  | 0.0555<br>39377 | 0.0670<br>14236 | 0            | -0.0114<br>74859 | -0.0128<br>13895 | -0.0101<br>35823 |
| Human<br>Disease      | Cardiovas<br>cular                   | 6          | 45         | 2.90E-<br>05    | 0.0001<br>30029 | 7.13E-<br>05 | -0.0001<br>01062 | -0.0001<br>53129 | -4.90E-<br>05    |

|   |          |  |  |  |  |  |  |  |  |
|---|----------|--|--|--|--|--|--|--|--|
| s | diseases |  |  |  |  |  |  |  |  |
|---|----------|--|--|--|--|--|--|--|--|

**Table S5 Analysis on the difference of metabolic pathway of KEGG (R vs W)**

| <b>Class1</b> | <b>Class2</b>                               | <b>R</b>    | <b>W</b>    | <b>R: rel. freq. (%)</b> | <b>W: rel. freq. (%)</b> | <b>p-values (corrected)</b> | <b>Effect size</b> | <b>95.0% lower CI</b> | <b>95.0% upper CI</b> |
|---------------|---------------------------------------------|-------------|-------------|--------------------------|--------------------------|-----------------------------|--------------------|-----------------------|-----------------------|
| Metabolism    | Carbohydrate metabolism                     | 4869<br>911 | 5511<br>771 | 15.717<br>15.663         | 15.926<br>48857          | 0                           | -0.2093<br>31947   | -0.2270<br>25874      | -0.1916<br>3802       |
| Metabolism    | Lipid metabolism                            | 1070<br>975 | 1434<br>282 | 3.4564<br>6.6005         | 4.1444<br>16719          | 0                           | -0.6879<br>50714   | -0.6972<br>01626      | -0.6786<br>99802      |
| Metabolism    | Metabolism of cofactors and vitamins        | 1933<br>746 | 2226<br>544 | 6.2409<br>7.4169         | 6.4336<br>90292          | 0                           | -0.1927<br>16123   | -0.2045<br>27452      | -0.1809<br>04794      |
| Metabolism    | Energy metabolism                           | 2012<br>550 | 2447<br>315 | 6.4953<br>06294          | 7.0716<br>17159          | 0                           | -0.5763<br>10866   | -0.5884<br>92336      | -0.5641<br>29395      |
| Metabolism    | Nucleotide metabolism                       | 1742<br>909 | 1731<br>120 | 5.6250<br>6.6605         | 5.0021<br>42306          | 0                           | 0.62292<br>43      | 0.61202<br>9644       | 0.63381<br>8956       |
| Metabolism    | Biosynthesis of other secondary metabolites | 4273<br>51  | 5327<br>46  | 1.3792<br>3.3132         | 1.5393<br>91437          | 0                           | -0.1601<br>58305   | -0.1659<br>68443      | -0.1543<br>48168      |
| Metabolism    | Amino acid                                  | 3330        | 3942        | 10.750                   | 11.392                   | 0                           | -0.6419            | -0.6571               | -0.6267               |



|                                |                                           |             |             |                 |                 |   |                  |                  |                  |
|--------------------------------|-------------------------------------------|-------------|-------------|-----------------|-----------------|---|------------------|------------------|------------------|
| ism                            | metabolism                                | 889         | 521         | 11517           | 07628           |   | 61108            | 65739            | 56476            |
| Metabolism                     | Metabolism of terpenoids and polyketides  | 5237<br>53  | 6968<br>24  | 1.6903<br>61063 | 2.0135<br>01554 | 0 | -0.3231<br>40491 | -0.3296<br>65894 | -0.3166<br>15088 |
| Metabolism                     | Xenobiotics biodegradation and metabolism | 6016<br>89  | 7168<br>49  | 1.9418<br>91803 | 2.0713<br>64614 | 0 | -0.1294<br>7281  | -0.1362<br>70264 | -0.1226<br>75356 |
| Metabolism                     | Metabolism of other amino acids           | 6428<br>97  | 7552<br>84  | 2.0748<br>86552 | 2.1824<br>24124 | 0 | -0.1075<br>37572 | -0.1145<br>35481 | -0.1005<br>39662 |
| Metabolism                     | Glycan biosynthesis and metabolism        | 8434<br>20  | 1220<br>926 | 2.7220<br>54724 | 3.5279<br>15798 | 0 | -0.8058<br>61075 | -0.8142<br>69909 | -0.7974<br>5224  |
| Genetic Information Processing | Translation                               | 1610<br>639 | 1538<br>206 | 5.1981<br>78248 | 4.4447<br>09383 | 0 | 0.75346<br>8865  | 0.74305<br>9014  | 0.76387<br>8716  |
| Metabolism                     | Global and                                | 4303        | 4643        | 13.888          | 13.416          | 0 | 0.47208          | 0.45542          | 0.48874          |

|                                      |                                  |             |             |                 |                 |   |                  |                  |                  |
|--------------------------------------|----------------------------------|-------------|-------------|-----------------|-----------------|---|------------------|------------------|------------------|
| ism                                  | overview maps                    | 396         | 194         | 78543           | 69967           |   | 5758             | 9782             | 1734             |
| Human Diseases                       | Drug resistance                  | 2183<br>33  | 3084<br>26  | 0.7046<br>48187 | 0.8912<br>09588 | 0 | -0.1865<br>61401 | -0.1908<br>66108 | -0.1822<br>56694 |
| Environmental Information Processing | Membrane transport               | 1509<br>030 | 1468<br>634 | 4.8702<br>45239 | 4.2436<br>78233 | 0 | 0.62656<br>7006  | 0.61643<br>4496  | 0.63669<br>9516  |
| Environmental Information Processing | Signal transduction              | 1066<br>990 | 1117<br>801 | 3.4436<br>04811 | 3.2299<br>31877 | 0 | 0.21367<br>2934  | 0.20495<br>3858  | 0.22239<br>2009  |
| Cellular Processes                   | Cell motility                    | 8081<br>52  | 2579<br>84  | 2.6082<br>30738 | 0.7454<br>55359 | 0 | 1.86277<br>5379  | 1.85646<br>8103  | 1.86908<br>2656  |
| Genetic Information Processing       | Folding, sorting and degradation | 6149<br>23  | 7575<br>27  | 1.9846<br>03231 | 2.1889<br>05364 | 0 | -0.2043<br>02134 | -0.2112<br>27795 | -0.1973<br>76473 |
| Genetic Information Processing       | Transcription                    | 6808<br>3   | 6943<br>9   | 0.2197<br>31156 | 0.2006<br>46841 | 0 | 0.01908<br>4315  | 0.01685<br>5496  | 0.02131<br>3134  |

|                                      |                                     |         |         |             |             |             |              |              |              |
|--------------------------------------|-------------------------------------|---------|---------|-------------|-------------|-------------|--------------|--------------|--------------|
| ing                                  |                                     |         |         |             |             |             |              |              |              |
| Genetic Information Processing       | Replication and repair              | 1374190 | 1423866 | 4.435062461 | 4.114319259 | 0           | 0.320743201  | 0.310922059  | 0.330564344  |
| Organismal Systems                   | Endocrine system                    | 143039  | 199848  | 0.461644241 | 0.577469    | 0           | -0.115824759 | -0.119304934 | -0.112344584 |
| Environmental Information Processing | Signaling molecules and interaction | 0       | 0       | 0           | 0           | 1.075       | 0            | -5.99E-06    | 5.99E-06     |
| Cellular Processes                   | Cell growth and death               | 219593  | 236691  | 0.708714713 | 0.683928361 | 0           | 0.024786352  | 0.020747487  | 0.028825216  |
| Cellular Processes                   | Transport and catabolism            | 174803  | 266873  | 0.564159413 | 0.771140489 | 0           | -0.206981076 | -0.210917547 | -0.203044606 |
| Organismal Systems                   | Circulatory system                  | 5082    | 225     | 0.016401653 | 0.000650147 | 0           | 0.015751506  | 0.015286676  | 0.016216336  |
| Organismal System                    | Development                         | 0       | 0       | 0           | 0           | 1.048780488 | 0            | -5.99E-06    | 5.99E-06     |

|                    |                                  |       |        |             |             |             |              |              |              |
|--------------------|----------------------------------|-------|--------|-------------|-------------|-------------|--------------|--------------|--------------|
| s                  |                                  |       |        |             |             |             |              |              |              |
| Cellular Processes | Cellular community               | 0     | 0      | 0           | 0           | 1.023809524 | 0            | -5.99E-06    | 5.99E-06     |
| Organismal Systems | Immune system                    | 37758 | 46780  | 0.121860215 | 0.13517273  | 0           | -0.013312516 | -0.015052687 | -0.011572344 |
| Organismal Systems | Environmental adaptation         | 69906 | 63132  | 0.225614709 | 0.182422506 | 0           | 0.043192203  | 0.04099257   | 0.045391836  |
| Organismal Systems | Nervous system                   | 92265 | 135929 | 0.297776172 | 0.392772426 | 0           | -0.094996254 | -0.097834824 | -0.092157683 |
| Organismal Systems | Sensory system                   | 0     | 0      | 0           | 0           | 1           | 0            | -5.99E-06    | 5.99E-06     |
| Human Diseases     | Endocrine and metabolic diseases | 45984 | 50408  | 0.148408817 | 0.145655985 | 0.004266266 | 0.002752832  | 0.000888971  | 0.004616692  |
| Organismal Systems | Excretory system                 | 7686  | 32024  | 0.024805806 | 0.092534663 | 0           | -0.067728857 | -0.068889691 | -0.066568023 |
| Organis            | Digestive                        | 7238  | 1734   | 0.0233      | 0.0501      | 0           | -0.0267      | -0.0276      | -0.0258      |

|                       |                                      |            |            |                 |                 |                 |                  |                  |                  |
|-----------------------|--------------------------------------|------------|------------|-----------------|-----------------|-----------------|------------------|------------------|------------------|
| mal<br>System<br>s    | system                               |            | 2          | 5993            | 10421           |                 | 50491            | 75994            | 24988            |
| Human<br>Disease<br>s | Neurodege<br>nerative<br>diseases    | 8377<br>2  | 6645<br>7  | 0.2703<br>65854 | 0.1920<br>3023  | 0               | 0.07833<br>5624  | 0.07599<br>0748  | 0.08068<br>05    |
| Human<br>Disease<br>s | Substance<br>dependenc<br>e          | 3267       | 2375<br>1  | 0.0105<br>4392  | 0.0686<br>2949  | 0               | -0.0580<br>8557  | -0.0590<br>3601  | -0.0571<br>3513  |
| Human<br>Disease<br>s | Infectious<br>diseases:<br>Bacterial | 2414<br>79 | 2722<br>20 | 0.7793<br>49615 | 0.7865<br>90865 | 0.0010<br>68603 | -0.0072<br>4125  | -0.0115<br>19192 | -0.0029<br>63307 |
| Human<br>Disease<br>s | Infectious<br>diseases:<br>Parasitic | 8287       | 2672<br>1  | 0.0267<br>45474 | 0.0772<br>11426 | 0               | -0.0504<br>65953 | -0.0515<br>6185  | -0.0493<br>70055 |
| Human<br>Disease<br>s | Infectious<br>diseases:<br>Viral     | 87         | 135        | 0.0002<br>80784 | 0.0003<br>90088 | 0.0178<br>15056 | -0.0001<br>09304 | -0.0002<br>03679 | -1.49E-<br>05    |
| Human<br>Disease<br>s | Cancers:<br>Overview                 | 2302<br>24 | 3067<br>42 | 0.7430<br>25215 | 0.8863<br>43601 | 0               | -0.1433<br>18386 | -0.1476<br>71194 | -0.1389<br>65579 |
| Human<br>Disease<br>s | Cancers:<br>Specific<br>types        | 2305<br>0  | 3779<br>8  | 0.0743<br>91598 | 0.1092<br>18873 | 0               | -0.0348<br>27275 | -0.0362<br>93621 | -0.0333<br>60929 |
| Human<br>Disease<br>s | Immune<br>diseases                   | 1731<br>1  | 2319<br>2  | 0.0558<br>69542 | 0.0670<br>14236 | 0               | -0.0111<br>44694 | -0.0123<br>48871 | -0.0099<br>40516 |
| Human<br>Disease      | Cardiovas<br>cular                   | 25         | 45         | 8.07E-<br>05    | 0.0001<br>30029 | 0.0566<br>11348 | -4.93E-<br>05    | -0.0001<br>04772 | 6.08E-0<br>6     |

|   |          |  |  |  |  |  |  |  |  |
|---|----------|--|--|--|--|--|--|--|--|
| s | diseases |  |  |  |  |  |  |  |  |
|---|----------|--|--|--|--|--|--|--|--|

**Table S6 Analysis on the difference of metabolic pathway of COG (FEN vs W)**

| <b>Class1</b>                                        | <b>Class2</b>                                                          | <b>FEN</b>  | <b>W</b>        | <b>FEN:<br/>rel.<br/>freq.<br/>(%)</b> | <b>W: rel.<br/>freq.<br/>(%)</b> | <b>p-val<br/>ues<br/>(corre<br/>cted)</b> | <b>Effect<br/>size</b> | <b>95.0%<br/>lower<br/>CI</b> | <b>95.0%<br/>upper<br/>CI</b> |
|------------------------------------------------------|------------------------------------------------------------------------|-------------|-----------------|----------------------------------------|----------------------------------|-------------------------------------------|------------------------|-------------------------------|-------------------------------|
| INFORMA<br>TION<br>STORAG<br>E AND<br>PROCES<br>SING | RNA<br>processing<br>and<br>modification                               | 795<br>0    | 177<br>02       | 0.0242<br>10278                        | 0.0317<br>69065                  | 0                                         | -0.007<br>558787       | -0.008<br>272124              | -0.006<br>845451              |
| INFORMA<br>TION<br>STORAG<br>E AND<br>PROCES<br>SING | Chromatin<br>structure and<br>dynamics                                 | 794<br>3    | 174<br>45       | 0.0241<br>88961                        | 0.0313<br>07838                  | 0                                         | -0.0071<br>18877       | -0.007<br>829791              | -0.006<br>407963              |
| METABO<br>LISM                                       | Energy<br>production<br>and<br>conversion                              | 163<br>1110 | 268<br>534<br>7 | 4.9672<br>48671                        | 4.8192<br>83963                  | 0                                         | 0.1479<br>64708        | 0.1386<br>40832               | 0.1572<br>88584               |
| CELLULA<br>R<br>PROCES<br>SES AND<br>SIGNALI<br>NG   | Cell cycle<br>control, cell<br>division,<br>chromosome<br>partitioning | 385<br>875  | 544<br>647      | 1.1751<br>1209                         | 0.9774<br>56006                  | 0                                         | 0.1976<br>56084        | 0.1931<br>5042                | 0.2021<br>61748               |
| METABO<br>LISM                                       | Amino acid<br>transport and                                            | 243<br>776  | 398<br>004      | 7.4237<br>75766                        | 7.1428<br>1907                   | 0                                         | 0.2809<br>56696        | 0.2697<br>21392               | 0.2921<br>91999               |

|                                    |                                                 |                 |                 |                 |                 |   |                  |                  |                  |
|------------------------------------|-------------------------------------------------|-----------------|-----------------|-----------------|-----------------|---|------------------|------------------|------------------|
|                                    | metabolism                                      | 7               | 1               |                 |                 |   |                  |                  |                  |
| METABOLISM                         | Nucleotide transport and metabolism             | 834<br>995      | 125<br>441<br>3 | 2.5428<br>25318 | 2.2512<br>44422 | 0 | 0.2915<br>80896  | 0.2849<br>30729  | 0.2982<br>31063  |
| METABOLISM                         | Carbohydrate transport and metabolism           | 281<br>815<br>2 | 450<br>218<br>4 | 8.5821<br>6906  | 8.0798<br>88055 | 0 | 0.5022<br>81005  | 0.4903<br>18641  | 0.5142<br>43369  |
| METABOLISM                         | Coenzyme transport and metabolism               | 130<br>230<br>4 | 230<br>056<br>5 | 3.9659<br>29835 | 4.1287<br>31225 | 0 | -0.162<br>801391 | -0.171<br>282219 | -0.154<br>320563 |
| METABOLISM                         | Lipid transport and metabolism                  | 800<br>689      | 145<br>445<br>9 | 2.4383<br>52638 | 2.6102<br>5891  | 0 | -0.171<br>906272 | -0.178<br>645637 | -0.165<br>166908 |
| INFORMATION STORAGE AND PROCESSING | Translation, ribosomal structure and biogenesis | 194<br>265<br>6 | 291<br>143<br>3 | 5.9160<br>05317 | 5.2250<br>31389 | 0 | 0.6909<br>73928  | 0.6810<br>06575  | 0.7009<br>41282  |
| INFORMATION STORAGE AND PROCESSING | Transcription                                   | 261<br>840<br>2 | 423<br>114<br>2 | 7.9738<br>66786 | 7.5934<br>59908 | 0 | 0.3804<br>06878  | 0.3688<br>16852  | 0.3919<br>96904  |
| INFORMATION STORAGE AND            | Replication, recombination and repair           | 201<br>646<br>3 | 335<br>857<br>5 | 6.1407<br>71104 | 6.0274<br>99104 | 0 | 0.1132<br>72001  | 0.1029<br>48548  | 0.1235<br>95454  |



|                                        |                                                                          |                 |                 |                 |                 |   |                  |                  |                  |
|----------------------------------------|--------------------------------------------------------------------------|-----------------|-----------------|-----------------|-----------------|---|------------------|------------------|------------------|
| PROCES<br>SING                         |                                                                          |                 |                 |                 |                 |   |                  |                  |                  |
| CELLULAR<br>PROCESSES AND<br>SIGNALING | Cell<br>wall/membrane/envelope<br>biogenesis                             | 238<br>202<br>3 | 453<br>292<br>4 | 7.2540<br>17559 | 8.1350<br>55893 | 0 | -0.881<br>038335 | -0.892<br>454763 | -0.869<br>621906 |
| CELLULAR<br>PROCESSES AND<br>SIGNALING | Cell motility                                                            | 615<br>110      | 772<br>156      | 1.8732<br>05565 | 1.3857<br>57233 | 0 | 0.4874<br>48333  | 0.4818<br>82626  | 0.4930<br>14039  |
| CELLULAR<br>PROCESSES AND<br>SIGNALING | Posttranslational<br>modification,<br>protein<br>turnover,<br>chaperones | 105<br>847<br>8 | 181<br>908<br>6 | 3.2234<br>02124 | 3.2646<br>40282 | 0 | -0.041<br>238158 | -0.048<br>876077 | -0.033<br>600239 |
| METABOLISM                             | Inorganic ion<br>transport and<br>metabolism                             | 155<br>587<br>0 | 317<br>871<br>6 | 4.7381<br>18943 | 5.7047<br>1341  | 0 | -0.966<br>594467 | -0.976<br>080125 | -0.957<br>108808 |
| METABOLISM                             | Secondary<br>metabolites<br>biosynthesis,<br>transport and<br>catabolism | 383<br>771      | 744<br>720      | 1.1687<br>04741 | 1.3365<br>1895  | 0 | -0.167<br>814209 | -0.172<br>573237 | -0.163<br>055181 |
| POORLY                                 | General                                                                  | 383             | 675             | 11.684          | 12.115          | 0 | -0.431           | -0.445           | -0.417           |

|                                  |                                                               |         |         |             |             |           |              |              |              |
|----------------------------------|---------------------------------------------------------------|---------|---------|-------------|-------------|-----------|--------------|--------------|--------------|
| CHARACTERIZED                    | function prediction only                                      | 6868    | 1015    | 48325       | 77436       |           | 291108       | 228777       | 353439       |
| POORLY CHARACTERIZED             | Function unknown                                              | 2457564 | 4518638 | 7.484063927 | 8.109417385 | 0         | -0.625353458 | -0.636863551 | -0.613843365 |
| CELLULAR PROCESSES AND SIGNALING | Signal transduction mechanisms                                | 2038226 | 3242537 | 6.20704636  | 5.819250385 | 0         | 0.387795976  | 0.377500958  | 0.398090993  |
| CELLULAR PROCESSES AND SIGNALING | Intracellular trafficking, secretion, and vesicular transport | 791901  | 1487278 | 2.411590383 | 2.669157846 | 0         | -0.257567463 | -0.264313263 | -0.250821662 |
| CELLULAR PROCESSES AND SIGNALING | Defense mechanisms                                            | 907769  | 1404743 | 2.764445291 | 2.52103561  | 0         | 0.243409681  | 0.236448798  | 0.250370564  |
| CELLULAR PROCESSES AND SIGNALING | Extracellular structures                                      | 16      | 735     | 4.87E-05    | 0.001319075 | 1.13E-122 | -0.00127035  | -0.001373397 | -0.001167302 |

|                                  |                   |      |       |             |             |          |              |             |              |
|----------------------------------|-------------------|------|-------|-------------|-------------|----------|--------------|-------------|--------------|
| NG                               |                   |      |       |             |             |          |              |             |              |
| CELLULAR PROCESSES AND SIGNALING | Nuclear structure | 0    | 0     | 0           | 0           | 1        | 0            | -4.74E-06   | 4.74E-06     |
| CELLULAR PROCESSES AND SIGNALING | Cytoskeleton      | 5391 | 10370 | 0.016417309 | 0.018610621 | 5.87E-14 | -0.002193311 | -0.00276401 | -0.001622613 |

**Table S7 Analysis on the difference of metabolic pathway of COG (R vs W)**

| <b>Class1</b>                      | <b>Class2</b>                                              | <b>R</b> | <b>W1</b> | <b>R: rel. freq. (%)</b> | <b>W: rel. freq. (%)</b> | <b>p-values (corrected)</b> | <b>Effect size</b> | <b>95.0% lower CI</b> | <b>95.0% upper CI</b> |
|------------------------------------|------------------------------------------------------------|----------|-----------|--------------------------|--------------------------|-----------------------------|--------------------|-----------------------|-----------------------|
| INFORMATION STORAGE AND PROCESSING | RNA processing and modification                            | 6762     | 17702     | 0.013342264              | 0.031769065              | 0                           | -0.018426801       | -0.018996238          | -0.017857365          |
| INFORMATION STORAGE AND PROCESSING | Chromatin structure and dynamics                           | 4840     | 17445     | 0.00954992               | 0.031307838              | 0                           | -0.021757918       | -0.022298407          | -0.021217429          |
| METABOLISM                         | Energy production and conversion                           | 2455957  | 2685347   | 4.845907602              | 4.819283963              | 1.74E-10                    | 0.026623639        | 0.018460659           | 0.034786619           |
| CELLULAR PROCESSES AND SIGNALING   | Cell cycle control, cell division, chromosome partitioning | 661520   | 544647    | 1.305260962              | 0.977456006              | 0                           | 0.327804956        | 0.32374699            | 0.331862923           |
| METABOLISM                         | Amino acid transport and                                   | 374466   | 398004    | 7.388684288              | 7.14281907               | 0                           | 0.245865218        | 0.235982664           | 0.255747771           |

|                                    |                                                 |                 |                 |                 |                 |              |                  |                  |                  |
|------------------------------------|-------------------------------------------------|-----------------|-----------------|-----------------|-----------------|--------------|------------------|------------------|------------------|
|                                    | metabolism                                      | 3               | 1               |                 |                 |              |                  |                  |                  |
| METABOLISM                         | Nucleotide transport and metabolism             | 137<br>962<br>9 | 125<br>441<br>3 | 2.7221<br>79036 | 2.2512<br>44422 | 0            | 0.4709<br>34615  | 0.4649<br>94384  | 0.4768<br>74845  |
| METABOLISM                         | Carbohydrate transport and metabolism           | 538<br>966<br>0 | 450<br>218<br>4 | 10.634<br>46728 | 8.0798<br>88055 | 0            | 2.5545<br>79228  | 2.5434<br>74335  | 2.5656<br>84121  |
| METABOLISM                         | Coenzyme transport and metabolism               | 187<br>910<br>8 | 230<br>056<br>5 | 3.7077<br>13019 | 4.1287<br>31225 | 0            | -0.421<br>018207 | -0.428<br>394145 | -0.413<br>642269 |
| METABOLISM                         | Lipid transport and metabolism                  | 109<br>215<br>5 | 145<br>445<br>9 | 2.1549<br>57199 | 2.6102<br>5891  | 0            | -0.455<br>301711 | -0.461<br>093976 | -0.449<br>509446 |
| INFORMATION STORAGE AND PROCESSING | Translation, ribosomal structure and biogenesis | 298<br>849<br>4 | 291<br>143<br>3 | 5.8966<br>69116 | 5.2250<br>31389 | 0            | 0.6716<br>37727  | 0.6629<br>04824  | 0.6803<br>7063   |
| INFORMATION STORAGE AND PROCESSING | Transcription                                   | 458<br>051<br>7 | 423<br>114<br>2 | 9.0379<br>27843 | 7.5934<br>59908 | 0            | 1.4444<br>67934  | 1.4339<br>43399  | 1.4549<br>92469  |
| INFORMATION STORAGE AND            | Replication, recombination and repair           | 306<br>546<br>1 | 335<br>857<br>5 | 6.0485<br>34548 | 6.0274<br>99104 | 5.59E<br>-06 | 0.0210<br>35444  | 0.0119<br>69606  | 0.0301<br>01282  |

|                                        |                                                                          |                 |                 |                 |                 |   |                  |                  |                  |
|----------------------------------------|--------------------------------------------------------------------------|-----------------|-----------------|-----------------|-----------------|---|------------------|------------------|------------------|
| PROCES<br>SING                         |                                                                          |                 |                 |                 |                 |   |                  |                  |                  |
| CELLULAR<br>PROCESSES AND<br>SIGNALING | Cell<br>wall/membrane/envelope<br>biogenesis                             | 326<br>981<br>6 | 453<br>292<br>4 | 6.4517<br>52295 | 8.1350<br>55893 | 0 | -1.683<br>303598 | -1.693<br>169778 | -1.673<br>437419 |
| CELLULAR<br>PROCESSES AND<br>SIGNALING | Cell motility                                                            | 953<br>023      | 772<br>156      | 1.8804<br>32516 | 1.3857<br>57233 | 0 | 0.4946<br>75283  | 0.4898<br>33593  | 0.4995<br>16973  |
| CELLULAR<br>PROCESSES AND<br>SIGNALING | Posttranslational<br>modification,<br>protein<br>turnover,<br>chaperones | 147<br>229<br>2 | 181<br>908<br>6 | 2.9050<br>14622 | 3.2646<br>40282 | 0 | -0.359<br>62566  | -0.366<br>198328 | -0.353<br>052993 |
| METABOLISM                             | Inorganic ion<br>transport and<br>metabolism                             | 218<br>121<br>2 | 317<br>871<br>6 | 4.3038<br>01659 | 5.7047<br>1341  | 0 | -1.400<br>91175  | -1.409<br>179992 | -1.392<br>643508 |
| METABOLISM                             | Secondary<br>metabolites<br>biosynthesis,<br>transport and<br>catabolism | 482<br>003      | 744<br>720      | 0.9510<br>51668 | 1.3365<br>1895  | 0 | -0.385<br>467282 | -0.389<br>499754 | -0.381<br>43481  |
| POORLY                                 | General                                                                  | 566             | 675             | 11.168          | 12.115          | 0 | -0.947           | -0.959           | -0.935           |

|                                  |                                                               |         |         |             |             |           |              |              |              |
|----------------------------------|---------------------------------------------------------------|---------|---------|-------------|-------------|-----------|--------------|--------------|--------------|
| CHARACTERIZED                    | function prediction only                                      | 0255    | 1015    | 38476       | 77436       |           | 389596       | 583689       | 195503       |
| POORLY CHARACTERIZED             | Function unknown                                              | 3409487 | 4518638 | 6.727340492 | 8.109417385 | 0         | -1.382076894 | -1.392027152 | -1.372126635 |
| CELLULAR PROCESSES AND SIGNALING | Signal transduction mechanisms                                | 3396240 | 3242537 | 6.701202518 | 5.819250385 | 0         | 0.881952134  | 0.872719511  | 0.891184757  |
| CELLULAR PROCESSES AND SIGNALING | Intracellular trafficking, secretion, and vesicular transport | 978971  | 1487278 | 1.931631136 | 2.669157846 | 0         | -0.737526709 | -0.74321095  | -0.731842469 |
| CELLULAR PROCESSES AND SIGNALING | Defense mechanisms                                            | 1621842 | 1404743 | 3.20009531  | 2.52103561  | 0         | 0.6790597    | 0.672698208  | 0.685421192  |
| CELLULAR PROCESSES AND SIGNALING | Extracellular structures                                      | 7       | 735     | 1.38E-05    | 0.001319075 | 5.98E-193 | -0.001305263 | -0.001404864 | -0.001205662 |

|                                  |                   |      |       |             |             |   |              |              |              |
|----------------------------------|-------------------|------|-------|-------------|-------------|---|--------------|--------------|--------------|
| NG                               |                   |      |       |             |             |   |              |              |              |
| CELLULAR PROCESSES AND SIGNALING | Nuclear structure | 0    | 0     | 0           | 0           | 1 | 0            | -3.69E-06    | 3.69E-06     |
| CELLULAR PROCESSES AND SIGNALING | Cytoskeleton      | 7139 | 10370 | 0.014086132 | 0.018610621 | 0 | -0.004524489 | -0.005012983 | -0.004035994 |
